# Supplementary material for: Target-Based Discovery of an Inhibitor of the Regulatory Phosphatase PPP1R15B
Source: PubMed Central journal article supplement (PMC6108835; doi:10.1016/j.cell.2018.06.030), 2018-08-23
Supplement: mmc5.pdf [file mmc5.pdf]

D2O EXCHANGE  
 AAA\_proton DMSO {Z:\2014JUN 14} O2B 2

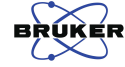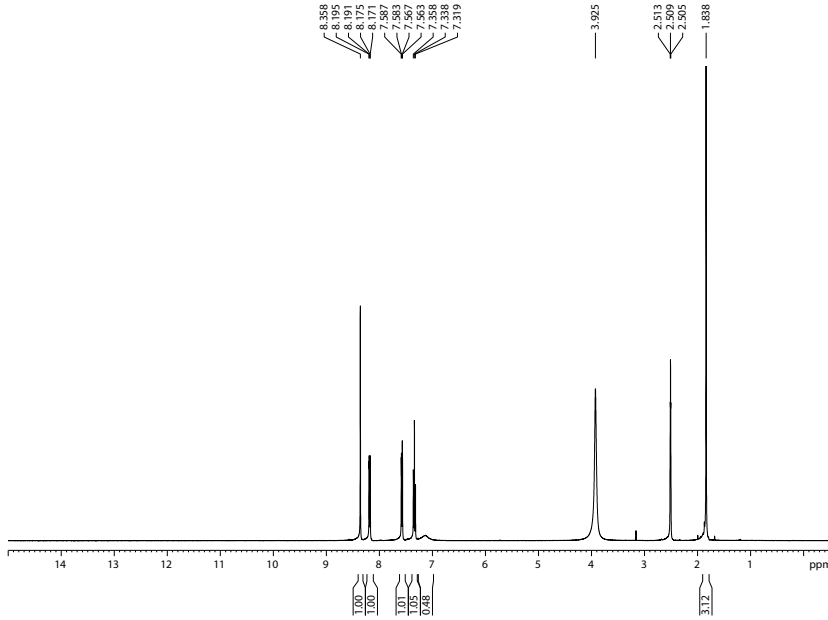

Current Data Parameters  
 NAME 27626-MANTIS-9  
 EXPNO 2  
 PROCNO 1

F2 - Acquisition Parameters  
 Date\_ 20140630  
 Time 15.18  
 INSTRUM spect  
 PROBHD 5 mm BBO BB/19  
 PULPROG zg30  
 TD 39998  
 SOLVENT DMSO  
 NS 24  
 DS 0  
 SWH 10000.000 Hz  
 FIDRES 0.250012 Hz  
 AQ 1.9999501 sec  
 RG 193.66  
 DW 50.000 usec  
 DE 6.50 usec  
 TE 294.0 K  
 D1 1.0000000 sec  
 TDO 1

===== CHANNEL f1 =====  
 NUC1 1H  
 P1 14.00 usec  
 PLW1 10.50000000 W  
 SFO1 400.1324710 MHz

F2 - Processing parameters  
 SI 65536  
 SF 400.1300000 MHz  
 WDW EM  
 SSB 0  
 LB 0.30 Hz  
 GB 0  
 PC 1.00
