# Supplementary material for: Target-Based Discovery of an Inhibitor of the Regulatory Phosphatase PPP1R15B
Source: PubMed Central journal article supplement (PMC6108835; doi:10.1016/j.cell.2018.06.030), 2018-08-23
Supplement: mmc6.pdf [file mmc6.pdf]

## LCMS Analysis Report

|                   |                                                                        |                     |                          |
|-------------------|------------------------------------------------------------------------|---------------------|--------------------------|
| Sample Name:      | MANTIS-9-O2B-719-C1-INT-1-78                                           |                     |                          |
| Sample Type:      | Unknown                                                                | Acquired By:        | LCMS-04                  |
| Vial:             | 2:A,2                                                                  | Sample Set Name:    | 30062014_UCH52_ASD_DCP01 |
| Injection #:      | 1                                                                      | Acq. Method Set:    | PDS_METHOD_C             |
| Injection Volume: | 0.40 ul                                                                | Processing Method:  | PDS_METHOD_C,            |
| Run Time:         | 4.0 Minutes                                                            | Channel Name:       | 226.0nm, 285.0nm, MS TIC |
| Project Name:     | JUNE30-06-2014                                                         | Proc. Chnl. Descr.: | SQ 1: MS Scan MS TIC,    |
| Date Acquired:    | 6/30/2014 15:39:59 IST                                                 |                     |                          |
| Date Processed:   | 6/30/2014 15:44:33 IST, 6/30/2014 15:44:40 IST, 6/30/2014 15:46:45 IST |                     |                          |

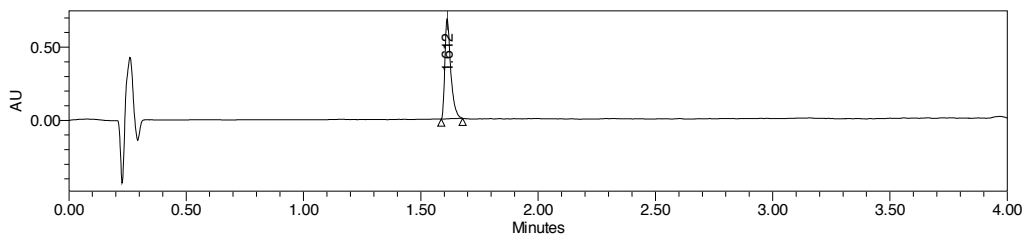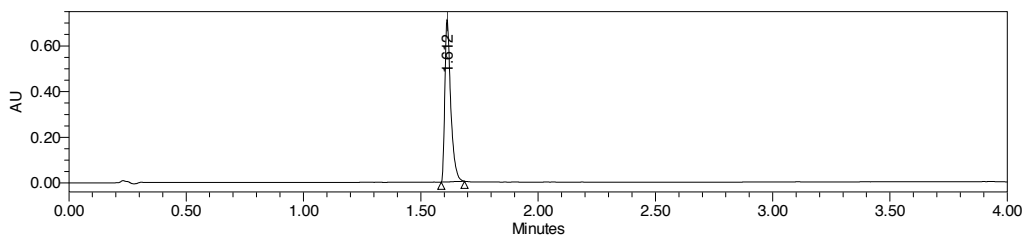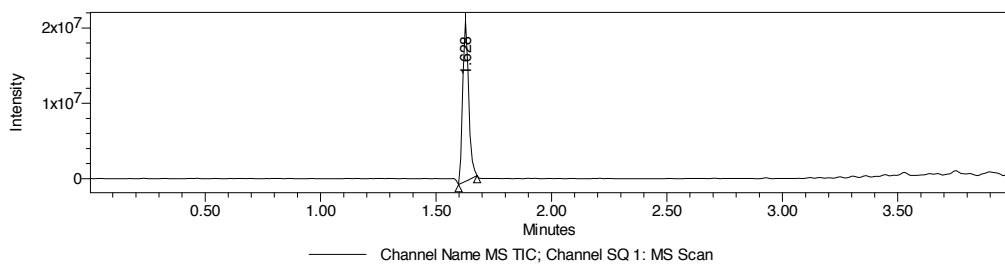

### Peak Results Channel: PDA Spectrum

|   | Retention Time (min) | Base Peak (m/z) | Height (μV) | Area (μV*sec) | % Area | Channel      | Channel Name |
|---|----------------------|-----------------|-------------|---------------|--------|--------------|--------------|
| 1 | 1.612                |                 | 709681      | 1231591       | 100.00 | PDA Spectrum | 285.0nm      |
| 2 | 1.612                |                 | 683051      | 1188522       | 100.00 | PDA Spectrum | 226.0nm      |
